# Supplementary material for: Full-Length Envelope Analyzer (FLEA): A tool for longitudinal analysis of viral amplicons
Source: PLOS journal article supplement (doi:10.1371/journal.pcbi.1006498), 2018-12-13
Supplement: S1 (10.1371/journal.pcbi.1006498.s001) [file journal.pcbi.1006498.s001]

---

## Supporting Information

### Simulation method

The simulation procedure begins with a population of copynumber-weighted HQCS sequences from a real FLEA run. The population is augmented with mutants of the input sequences, to ensure that the simulated ground truth population contains sequences that differ by only a few bases. Each HQCS has a  $p = 0.2$  probability to donate 30% of its abundance to a closely-related mutant, which contains one, two, or three substitutions with equal probability. This mutated population is treated as the ground truth for all experiments.

In order to simulate sequencing at different depths, different numbers of  $N$  reads are drawn from the same ground truth population for each time point. For each value of  $N$  (300, 1,000, 3,000, and 10,000 in this paper), and for each time point,  $N$  sequences are sampled with replacement from the copynumber-weighted population. Each read is then mutated with an error model derived from true Pacific Biosciences sequences, in order to mimic the errors introduced by sequencing, especially homopolymer length errors.

To simulate a read  $r$  from template  $t$ , it is necessary to model both  $r$  itself and its Phred scores. First an error rate  $p$  is drawn from  $p \sim \text{Gamma}(\alpha = 2, \theta = 0.0017)$ . The length  $n$  for each run of identical bases in  $t$  (including singletons) is lengthened or shortened with equal probability to be  $m = \max(n \pm \epsilon, 0)$ , where  $\epsilon \sim \text{Poisson}(\lambda = p/c \cdot n^{1.5})$ .  $c$  is calibration parameter chosen in these experiments to be 1.55 to match observed errors. This process introduces homopolymer length errors, which account for most of the error in Pacific Sciences reads. Then point mutations are introduced at each position with probability  $p/4$  of occurring and equal probability for each nucleotide.

Finally, error probabilities are computed for each base as  $P = p/4 + m^{1.5}/m$ , which is the per-base mutation rate plus a homopolymer error rate. The final simulated Phred scores are obtained by adding error per-base errors  $\epsilon \sim \mathcal{N}(0, 0.1)$  in the natural log domain to these probabilities, then converting to Phred scores.

### Sequence order for clustering

USEARCH's `cluster_fast` algorithm runs in a single pass, and therefore is sensitive to the order of the input sequences. We investigated four different strategies: none (no re-ordering), shuffle (randomly shuffle the sequences), sort (sort from high to low quality, as measured by expected number of errors), and reverse sort (sort from low to high quality). Ten trials of simulated sequencing were run to generate 3,000 reads. FLEA was run on each dataset with all four ordering strategies.

The results clearly favor reverse sorting, as shown in Table A, which does better on average across the ten trials, and in the worst case it does much better. In the worst case, other methods suffer from false negatives, as shown in Table C. We hypothesize that this behavior is caused by reads from the rare templates – which have a low chance of having a high-quality representative read – loading onto the nearest high-quality template.

**Table A.**  $EMD$  score statistics for different ordering strategies, summarized over ten trials.

| strategy     | min      | median   | max       |
|--------------|----------|----------|-----------|
| none         | 1.161733 | 1.754568 | 4.650523  |
| shuffle      | 1.042900 | 1.877201 | 15.177280 |
| sort         | 1.362890 | 2.170702 | 15.585899 |
| reverse sort | 1.077585 | 1.495208 | 2.853009  |

**Table B.**  $EMD_{FP}$  score statistics for different ordering strategies, summarized over ten trials.

| strategy     | min | median   | max      |
|--------------|-----|----------|----------|
| none         | 0.0 | 0.012702 | 0.726121 |
| shuffle      | 0.0 | 0.005160 | 0.634556 |
| sort         | 0.0 | 0.019261 | 0.839726 |
| reverse sort | 0.0 | 0.005992 | 0.079191 |

**Table C.**  $EMD_{FN}$  score statistics for different ordering strategies, summarized over ten trials.

| strategy     | min      | median   | max       |
|--------------|----------|----------|-----------|
| none         | 0.109267 | 0.363806 | 4.064444  |
| shuffle      | 0.104379 | 0.359525 | 13.443283 |
| sort         | 0.170185 | 0.623503 | 13.672487 |
| reverse sort | 0.096213 | 0.233316 | 1.011137  |

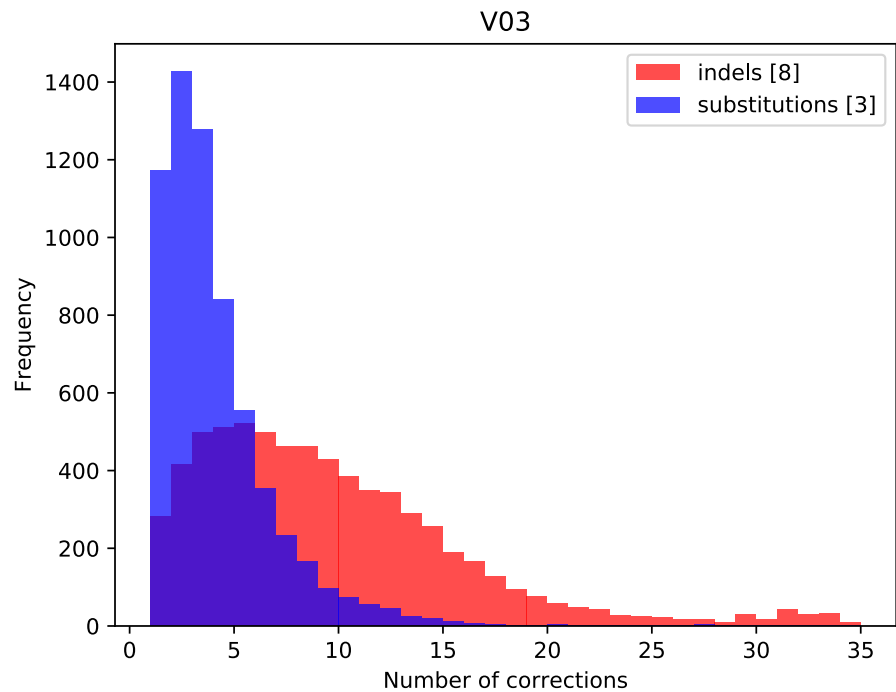

**Figure A.** Distribution of corrections in V03.

### Analysis of error correction in P018 run

To quantify the kinds of corrections FLEA makes, we took each quality controlled CCS sequence and aligned it to its corresponding HQCS. Counting differences reveals far more indels vs substitutions, as expected under the PacBio error model: Fig. A through Fig. F. Different time points, however, have different correction profiles, and it is not clear whether this is due to the behavior of the error correction itself, or varying noise profiles caused by differences during amplification and sequencing.

Additionally, the number of corrections (both substitutions and indels) per CCS sequence correlates extremely strongly with the expected number of errors per sequence, as derived from the QV scores. The Spearman correlation coefficients range between 0.69 and 0.76. Scatter plots are depicted in Fig. G through Fig. L. The number of expected errors becomes discrete for values  $\geq 10$  in these plots because of rounding in USEARCH.

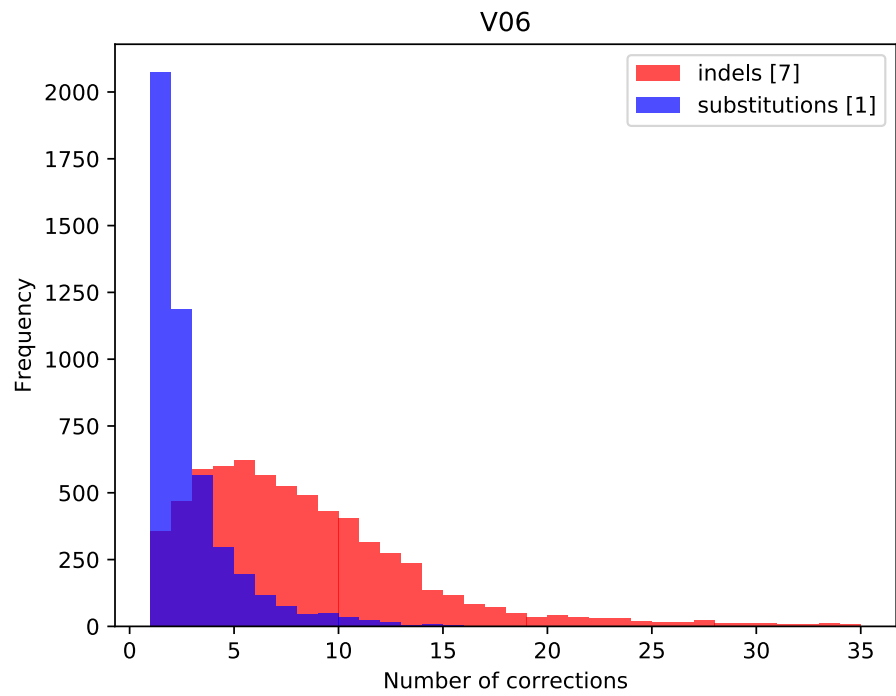

Figure B. Distribution of corrections in V06.

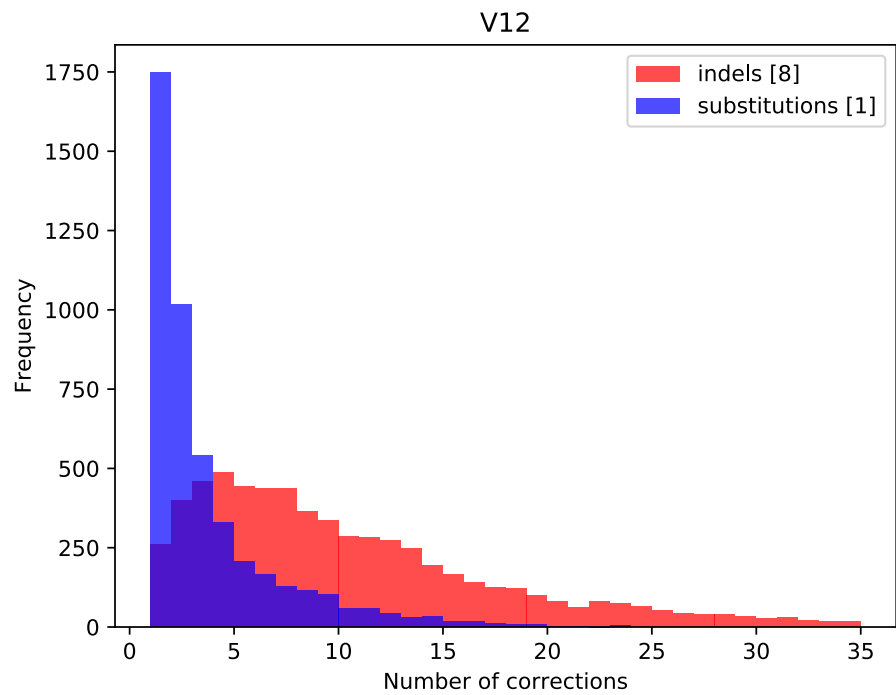

Figure C. Distribution of corrections in V12.

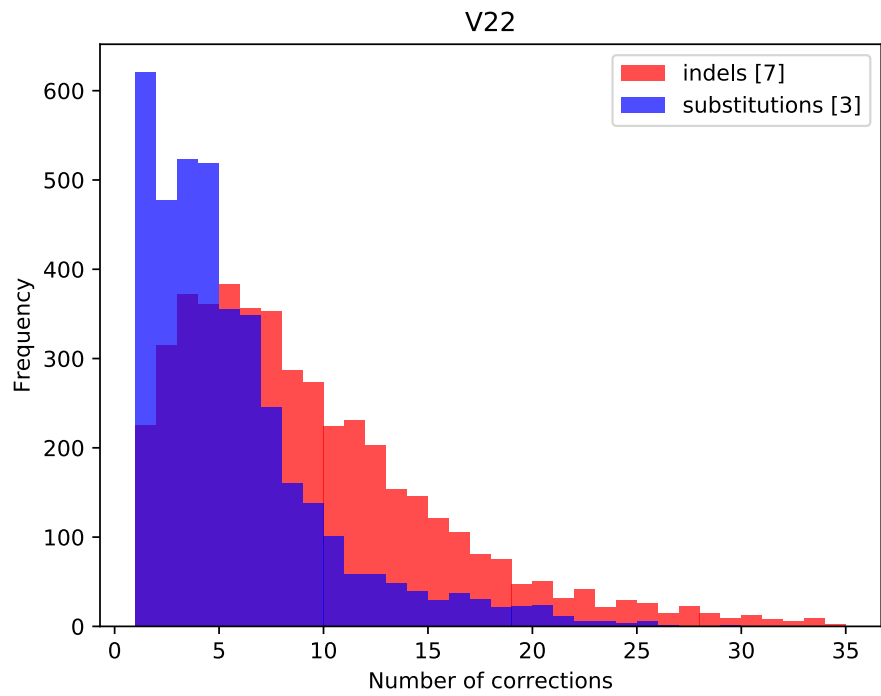

Figure D. Distribution of corrections in V22.

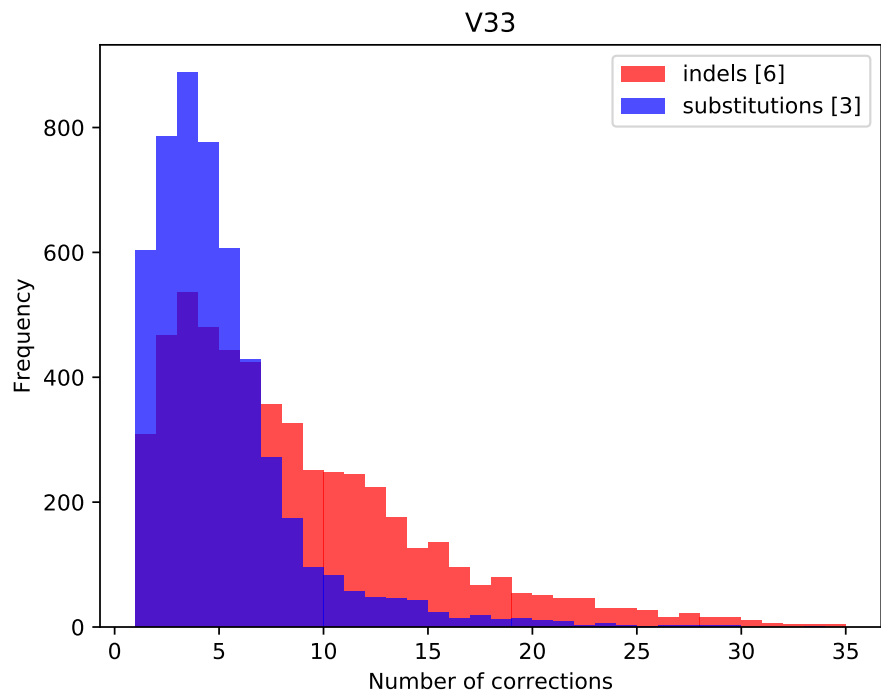

Figure E. Distribution of corrections in V33.

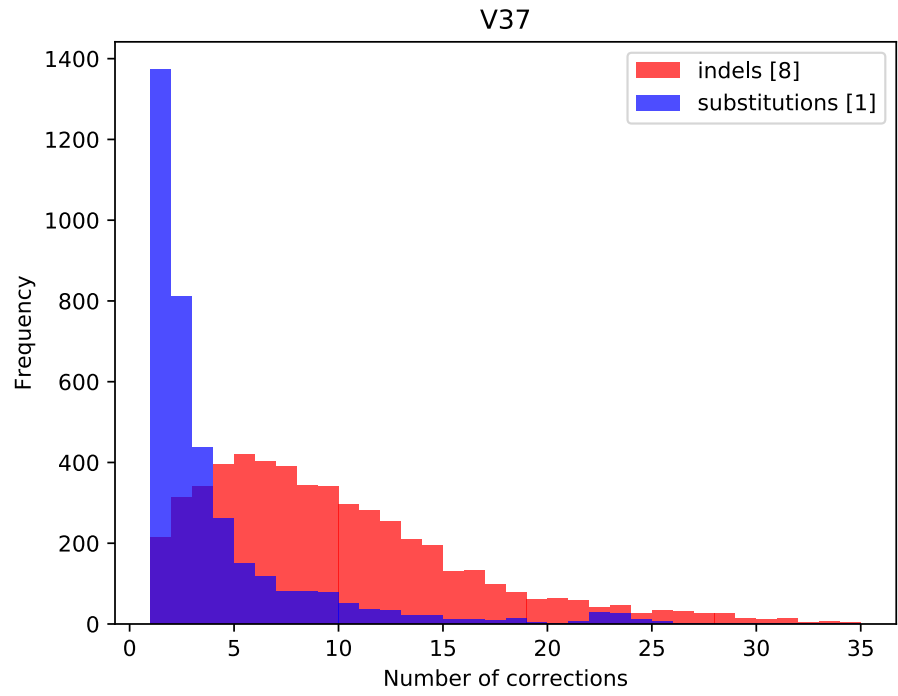

**Figure F.** Distribution of corrections in V37.

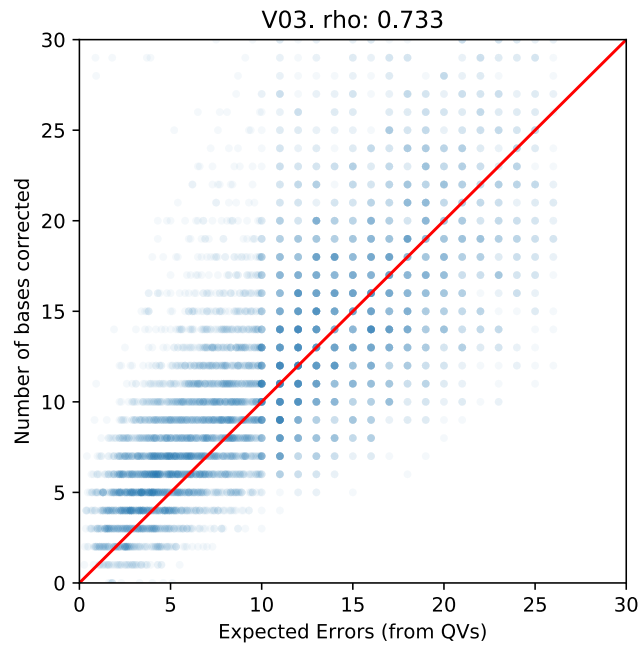

**Figure G.** Number of corrections versus expected number of errors in V03

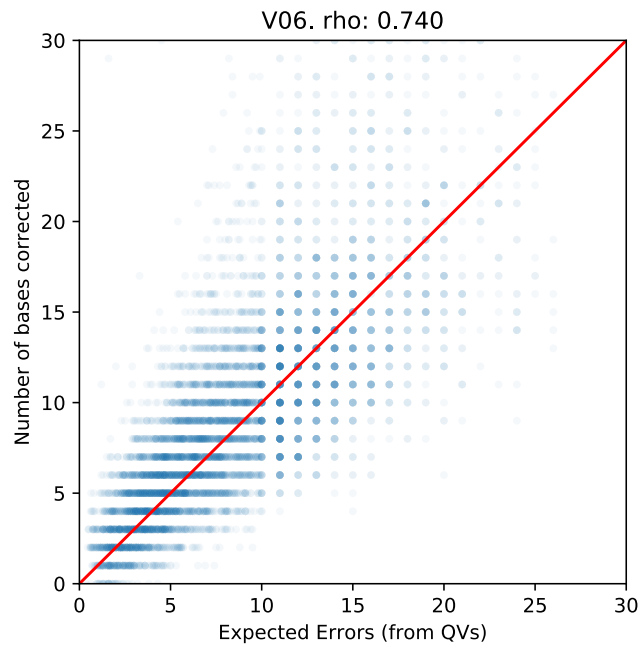

**Figure H.** Number of corrections versus expected number of errors in V06

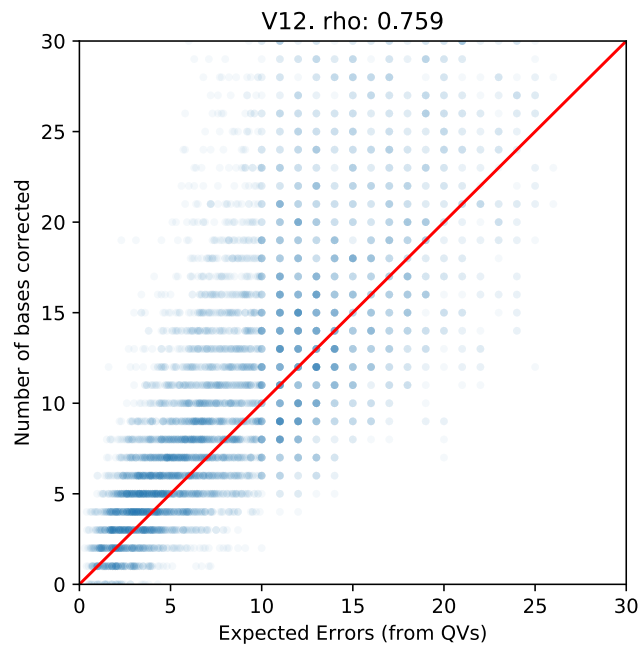

**Figure I.** Number of corrections versus expected number of errors in V12

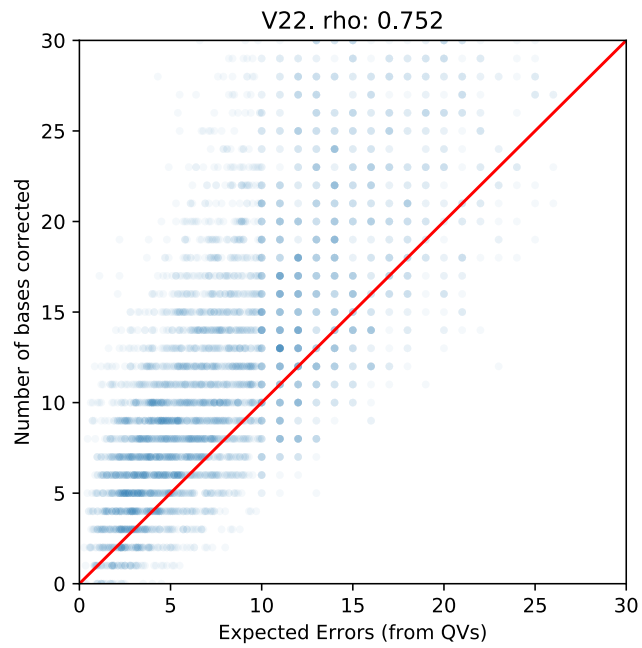

**Figure J.** Number of corrections versus expected number of errors in V22

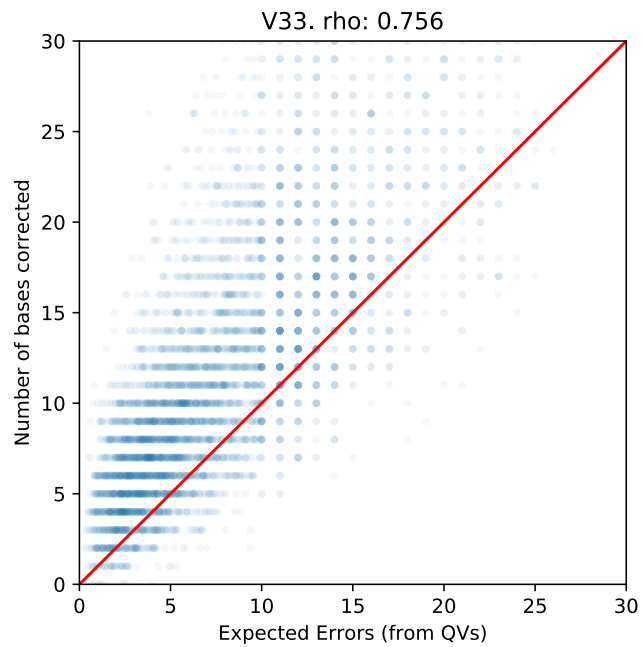

**Figure K.** Number of corrections versus expected number of errors in V33



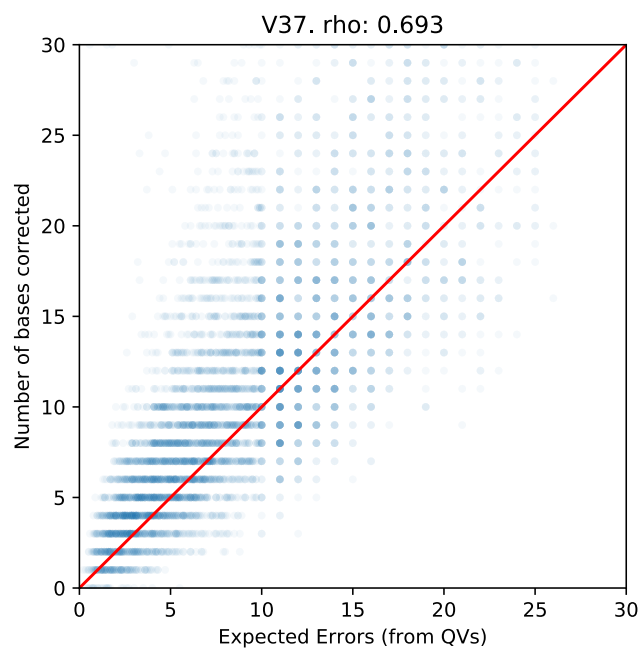

**Figure L.** Number of corrections versus expected number of errors in V37

---

## Analysis of false negatives in simulation results

As shown in the main text, FLEA fails to recover some genuine sequences. All such failures are low-abundance sequences, where each makes up at most 1.6% of the population, and most make up much less. A breakdown appears in Table D. The fraction of the population represented by these false negatives at each time point is small: 10% of the population or less in most cases. Moreover, most of these templates differ from a FLEA-inferred sequence by only one base.

Fig. M plots abundance versus edit distance to nearest HQCS for all template sequence. The false negative sequences obviously have an edit distance  $\geq 1$ , but the positives are also shown for reference. These plots confirm that the templates that FLEA fails to find tend to be extremely rare and also very similar to more high-abundance templates that were recovered.

**Table D.** False negatives by time point. “Total” is the number of true template sequences. False negatives are reported as  $n$  ( $x\%$ ), where  $n$  is the number of missing sequence, and  $x$  is their total abundance in the population. “Off-by-one” false negatives are sequences that do not appear in the FLEA results, but a sequence that differs by only one base does. “Remaining” false negatives differ by more than one base from any sequence in the FLEA results.

| time point | total | false negatives | off-by-one | remaining  |
|------------|-------|-----------------|------------|------------|
| V03        | 127   | 65 (10.02%)     | 27 (6.57%) | 38 (3.45%) |
| V06        | 147   | 52 (15.23%)     | 26 (7.77%) | 26 (7.46%) |
| V12        | 104   | 16 (3.3%)       | 12 (2.55%) | 4 (0.75%)  |
| V22        | 137   | 26 (6.48%)      | 16 (4.38%) | 10 (2.10%) |
| V33        | 80    | 35 (7.84%)      | 15 (4.67%) | 20 (3.17%) |
| V37        | 79    | 19 (2.32%)      | 13 (1.61%) | 6 (0.71%)  |

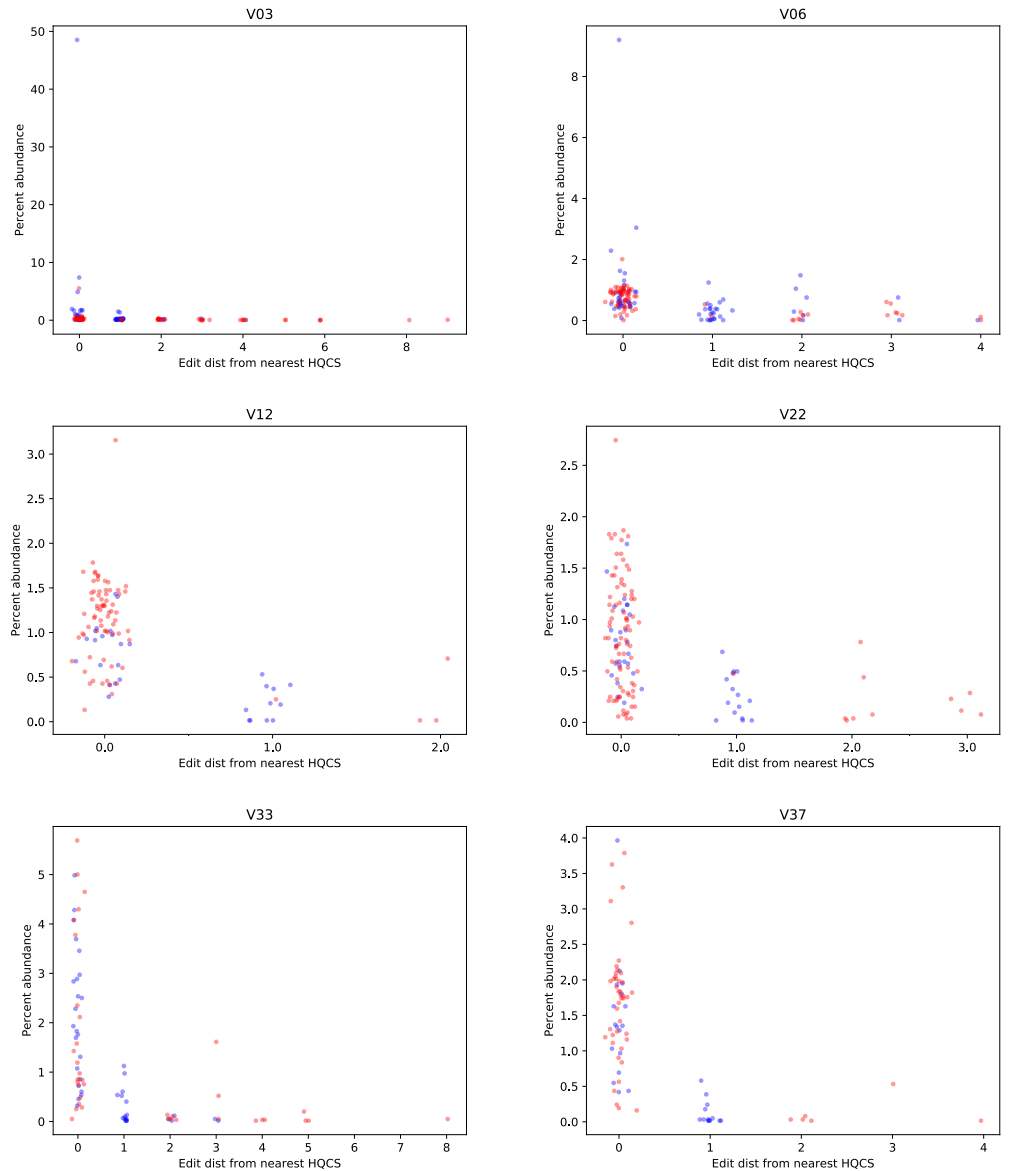

**Figure M.** From the  $N=10,000$  simulation condition, for each time point, we depict the edit distance from each true template to the nearest HQCS. The Y axis displays the variant frequency (note: the number of reads is a Binomial variate from this, so many low abundance variants may generate no reads at all). In red, we color all true template sequences which are within 1bp of another true template.

### Processes execution timeline

Launch time: 12 Oct 2017 19:13  
Elapsed time: 1h 4m 7s

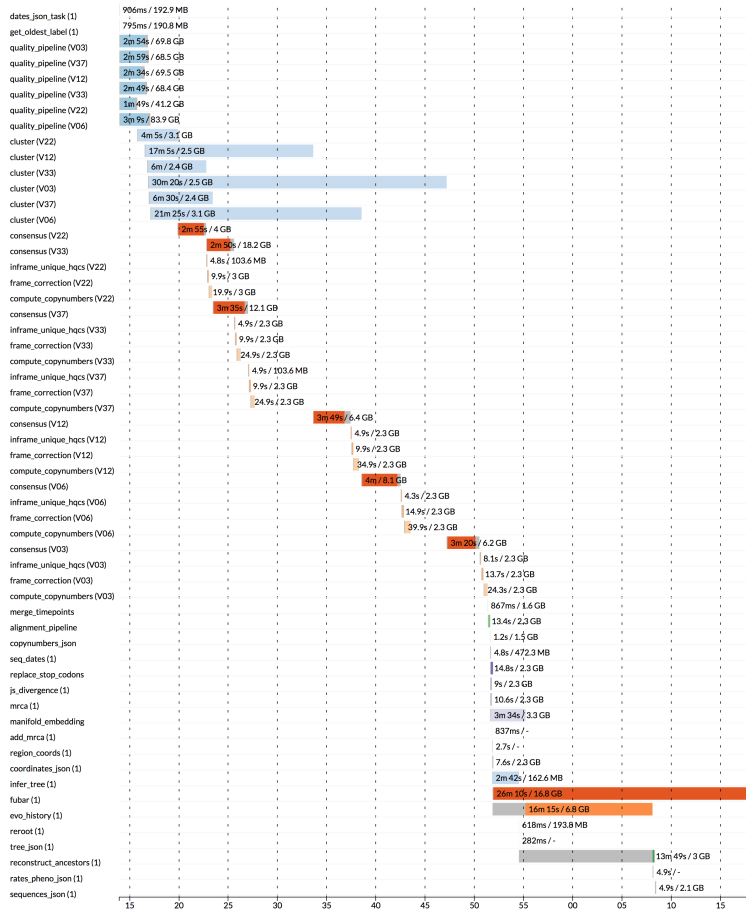

Created with Nextflow—<http://nextflow.io>

**Figure N.** Timeline of each task in the FLEA pipeline. Tasks are annotated with time per task and max memory used. Image generated with Nextflow's `-with-timeline` option.

## Pipeline visualizations

Nextflow provides pipeline introspection and performance tools including tracing reports, task order graphs, and timeline visualizations (Fig. N).
